# Supplementary material for: An outbreak of severe infections among Australian infants caused by a novel recombinant strain of human parechovirus type 3
Source: PubMed Central journal article supplement (PMC5349594; doi:10.1038/srep44423), 2017-03-14
Supplement: srep44423-s1.pdf [file srep44423-s1.pdf]

## **Supplementary materials**

### **Title**

**An outbreak of severe infections among Australian infants caused by a novel recombinant strain of human parechovirus type 3**

### **Running title**

Australian outbreak caused by a recombinant strain of human parechovirus type 3

### **Authors**

Tiffanie M. Nelson<sup>1,2</sup>, Peter Vuillermin<sup>2,3</sup>, Jason Hodge<sup>1,3</sup>, Julian Druce<sup>4</sup>, David T. Williams<sup>5</sup>, Rekha Jasrotia<sup>3</sup>, and Soren Alexandersen<sup>1,2,3\*</sup>

<sup>1</sup>Geelong Center for Emerging Infectious Diseases, Geelong, Victoria 3220, Australia

<sup>2</sup>Deakin University, School of Medicine, Geelong, Victoria 3220, Australia

<sup>3</sup>Barwon Health, University Hospital Geelong, Geelong, Victoria 3220, Australia

<sup>4</sup>Victorian Infectious Diseases Reference Laboratory (VIDRL), Doherty Institute, Melbourne, Victoria 3000, Australia

<sup>5</sup>CSIRO, Australian Animal Health Laboratory, Geelong, Victoria 3220, Australia

**\*Corresponding author**

**Table S1. Next generation sequencing coverage outcomes.**

| Sample      | Number of mapped reads | Average coverage |
|-------------|------------------------|------------------|
| CS-HP-16001 | 4.3 million            | 68000            |
| CS-HP-16002 | 2.4 million            | 49000            |
| CS-HP-16003 | 773000                 | 1800             |

**Table S2. Additional clinical findings**

| GCEID<br>Sample ID | Age<br>(weeks) | Clinical features |                 |      |       |           |             |            |        |          | Laboratory findings |                                     |                                     |             |
|--------------------|----------------|-------------------|-----------------|------|-------|-----------|-------------|------------|--------|----------|---------------------|-------------------------------------|-------------------------------------|-------------|
|                    |                | Irritability      | Poor<br>feeding | Rash | Fever | Diarrhoea | Tachycardia | Tachypnoea | Coryza | Lethargy | Peripheral blood    |                                     |                                     | CSF         |
|                    |                |                   |                 |      |       |           |             |            |        |          | CRP<br>(mg/L)       | Neutrophils<br>(10 <sup>9</sup> /L) | Lymphocytes<br>(10 <sup>9</sup> /L) | Pleocytosis |
| CS-HP-16001        | <1             | +                 | +               | +    | +     | -         | +           | +          | -      | -        | <2.9                | 4.7                                 | 4.2                                 | -           |
| CS-HP-16002        | 6              | -                 | -               | -    | -     | -         | +           | +          | -      | -        | NC                  | NC                                  | NC                                  | -           |
| CS-HP-16003        | 7              | +                 | +               | -    | +     | +         | +           | -          | -      | +        | <2.9                | 1.3                                 | 6.7                                 | -           |
| CS-HP-16004        | 12             | +                 | +               | +    | +     | +         | +           | -          | +      | -        | <2.9                | 0.6                                 | 1.5                                 | -           |
| CS-HP-16005        | 8              | +                 | +               | +    | +     | -         | +           | -          | +      | +        | 6.6                 | 3.8                                 | 2.3                                 | -           |
| CS-HP-16006        | 4              | +                 | +               | +    | +     | +         | +           | +          | -      | -        | 5.5                 | 2.4                                 | 2.2                                 | -           |
| CS-HP-16007        | 11             | +                 | +               | +    | +     | -         | +           | -          | -      | +        | 11                  | 3.5                                 | 2.5                                 | -           |
| CS-HP-16008        | 3              | -                 | +               | +    | +     | -         | +           | +          | -      | +        | <2.9                | 2.0                                 | 2                                   | -           |
| CS-HP-16010        | 9              | +                 | +               | -    | +     | -         | +           | -          | -      | -        | <2.9                | 2.7                                 | 1.4                                 | -           |
| CS-HP-16011        | 28             | -                 | +               | +    | +     | +         | +           | +          | +      | -        | 47                  | 2.2                                 | 3.4                                 | NC          |
| CS-HP-16012        | 4              | +                 | +               | +    | +     | -         | +           | +          | +      | +        | 12                  | 2.9                                 | 0.3                                 | NT          |
| CS-HP-16013        | 3              | +                 | +               | +    | +     | +         | +           | -          | +      | +        | <2.9                | 3.0                                 | 2.4                                 | NC          |
| CS-HP-16014        | 15             | +                 | +               | +    | +     | -         | +           | +          | -      | +        | 40                  | 3.7                                 | 1.7                                 | NC          |
| CS-HP-16015        | 7              | +                 | +               | +    | +     | +         | +           | +          | +      | +        | 5.4                 | 1.4                                 | 2.8                                 | -           |
| CS-HP-16016        | 11             | +                 | +               | +    | +     | -         | +           | -          | +      | -        | <2.9                | 2.1                                 | 1.6                                 | NC          |
| CS-HP-16017        | 11             | +                 | +               | +    | +     | +         | +           | +          | +      | +        | 10                  | 2.5                                 | 3.3                                 | NC          |

CSF = cerebrospinal fluid; CRP = C reactive protein; NC = not collected; NT = specimen collected; + = reported/recorded; - = not reported/recorded

**Table S3. Generation of composite reference sequence for design of Ampliseq panel (with partial VP1 sequence from clinical samples)**

| Nucleotide position | Generated from sequence NCBI ID                    | Reference     |
|---------------------|----------------------------------------------------|---------------|
| 1-57                | AJ889918 (1-57)                                    | <sup>38</sup> |
| 58-700              | GQ183027 (1-643)                                   | <sup>19</sup> |
| 701-7231            | AB759207 (1-6530)                                  | <sup>52</sup> |
| (2258-2707)         | From partial VP1 sequences generated in this study | This study    |
| 7232-7334           | GQ183027 (7175-7277)                               | <sup>19</sup> |

Based on VP1 sequences generated from clinical samples, a composite reference full-length sequence for construction of an Ampliseq panel was generated with the most closely aligned HPeV sequences at the National Center for Biotechnology Information (NCBI). The VP1 partial sequence generated in this study was 450 nucleotides long, generated from primers AN353 and AN357 designed by <sup>84</sup>.

**Table S4. Ion Ampliseq Custom Panel Primer Pairs**

| Amplicon    | Forward primer                  | Reverse primer                 | Amplicon start | Insert start | Insert stop | Amplicon stop |
|-------------|---------------------------------|--------------------------------|----------------|--------------|-------------|---------------|
| AMPL1429677 | GGGTCTCCTAGAGAGCTTGG            | GTACAACACACTTTAAGCGTCTGAAC     | 9              | 29           | 191         | 217           |
| AMPL1429679 | AGATAACAGTTTGCTGCAAAGCATC       | CCAACTCACCTAGATAGAGGTAGCT      | 367            | 392          | 608         | 633           |
| AMPL1429681 | GATACTCTTTCCTTGTCTAGTGTGGAAA    | CCATTGAATGAAAGTTGTCCACATTTCTAA | 746            | 774          | 983         | 1013          |
| AMPL1429683 | GCCTATGGTCAAGCCAAATATTTTCG      | GCAATTGCCCTAGATCAGACGA         | 1157           | 1182         | 1408        | 1430          |
| AMPL1429684 | GGGCTTCTAATGAGGTTGATGTCAC       | CACCCACTAGAGCCACAGATTG         | 1467           | 1492         | 1714        | 1736          |
| AMPL1429686 | GCACCACAAAATATGGTGCACA          | CAAGTGGAGAAGGAATATGGTATAGTCAAT | 1895           | 1917         | 2139        | 2169          |
| AMPL1429688 | CCCCTGGATCTTTGGTCTCTTTTC        | GTCACATACCAAGCTCTACCAAAGAT     | 2309           | 2334         | 2545        | 2571          |
| AMPL1429690 | GGTTTCTTAGAGTGGCTCATAATATGAC    | GGGCACCTTAAACTAATATAAACTTCTGC  | 2709           | 2738         | 2917        | 2946          |
| AMPL1429692 | GGGTTTTTACAAGCACTATGGTATTATTGT  | CCAAAAATATCCTTAGCAATGGTTTCACA  | 3067           | 3097         | 3286        | 3315          |
| AMPL1429694 | GGGCTATCTTACTTGTGCAAAAATGC      | CCATCCATTAGACACTGCATGAGT       | 3461           | 3488         | 3684        | 3708          |
| AMPL1429696 | GGGCCTTTTAAGGGTTTTAATGAAGT      | TTTGTCTGGTCTTTTGATTCCACAATAAT  | 3827           | 3853         | 4012        | 4042          |
| AMPL1429698 | AGTTGGCCAGAATACCTTCTAGAATTAGTA  | CCTTCCTAGTTTGGCCCAAATCAT       | 4167           | 4197         | 4388        | 4412          |
| AMPL1429700 | GCAAGACTCTGGTGCATTAAAGAGAA      | CTGCTGTTCCAGCAATTATAATTCTTCTG  | 4558           | 4584         | 4771        | 4801          |
| AMPL1429702 | CCTAGACCTAGTGTTTTTTAAATGTTTTGCG | CCCTTGGTTTGGTCCACAGGTA         | 4943           | 4973         | 5183        | 5205          |
| AMPL1429704 | ATCAGCATGATGAGATCATTCTACATGG    | AACTTCTTTGGTGATAATACCTTGTCTGT  | 5334           | 5362         | 5575        | 5605          |
| AMPL1429706 | GTGGAAGGAAACTTTAAAATTCTTGGGATG  | GCTGCAGACTTCTTGATTAACACTCA     | 5723           | 5753         | 5970        | 5997          |
| AMPL1429708 | GGTATTGTGGATATGAAAACAGCCATTC    | GTTTTCTCAATTCATCTTTAAGGCAAGTGT | 6095           | 6123         | 6308        | 6338          |
| AMPL1429710 | ATGTTATTACTCAGGCCTTGCTGTT       | GCCATGAATTAACCATCTCTCATTGAAGA  | 6451           | 6476         | 6674        | 6703          |
| AMPL1429712 | GATAAAGAAATAGACCCAGAGAAACTGCA   | TGGAGGCATAACTCCATTAAGTAGGA     | 6845           | 6874         | 7087        | 7113          |
| AMPL1429614 | CCCTATGTTGCAGACACAACTATG        | GTGGGTTTTGAAAATCCAATTGTAATAAGC | 1373           | 1398         | 1502        | 1532          |
| AMPL1429678 | CTGGCCGAAGGCAACTAGCAAT          | GGCATCTGTTACCAGATGTGAATCC      | 159            | 181          | 402         | 427           |
| AMPL1429680 | CGTAGGTAACAAGTGACACTATGGATCT    | CCACCAACTTCATTACCAGAAATAATGTT  | 570            | 598          | 784         | 813           |
| AMPL1429682 | CATCAGCTCCAATATCCCATT           | TGGACTTGAAATGAAAGCCACA         | 951            | 973          | 1192        | 1215          |
| AMPL1429685 | ATGAACATGGCCAATGTCCTGA          | TTCAAGTTGGGAATTGGTCTAGTGT      | 1679           | 1701         | 1927        | 1953          |

|             |                               |                                 |      |      |      |      |
|-------------|-------------------------------|---------------------------------|------|------|------|------|
| AMPL1429687 | TACACAATCTGTGACATTGGTTCAGAA   | GGATCTGTAAGGTCCATTTGTGAACC      | 2102 | 2129 | 2344 | 2370 |
| AMPL1429689 | TGTTGACATTTTTACAGTTAGTCACACCA | CCCATTTGAAGACAAGAATGTTTTCTTA    | 2506 | 2535 | 2748 | 2776 |
| AMPL1429691 | GTAGACCAATGATGCATGGGACTA      | GCTGTTTTGAAAATGTCATCTGAATCCAAT  | 2883 | 2907 | 3114 | 3144 |
| AMPL1429693 | CTGTCAACTCAGAGCATATCTTCTCAG   | CAAATTTCTGTGGCTGCTGTAGAA        | 3249 | 3276 | 3498 | 3523 |
| AMPL1429695 | GTAACATCTTCTTCAGTGTTCACCT     | TGTATCCACCAATCAATGTGCCTAA       | 3647 | 3674 | 3863 | 3888 |
| AMPL1429697 | GAGCATGTTGTGCTATCTTGGATT      | CCAGATACCAATTGGTTCCACTCTAATTAA  | 3977 | 4002 | 4207 | 4237 |
| AMPL1429699 | GATGGGTATGACAACCAGGACAT       | ATATGCTTTAGCTGCCCTAATATGCATAAT  | 4355 | 4378 | 4594 | 4624 |
| AMPL1429701 | GGACCTAGTCCAGAAAATTACAGAAGATT | TAGCTGCTTTCCTTGTCTGGTTT         | 4732 | 4761 | 4983 | 5006 |
| AMPL1429703 | AAGACTCAAAAGACGAAAGGGCTTA     | GTCAAATCTTCTCCTGTTCAAGGTAAT     | 5148 | 5173 | 5372 | 5400 |
| AMPL1429705 | ACTAACAAAATTGGAACAGAAAGCATGT  | GGATAGCTACACCCATTTCTCCATT       | 5537 | 5565 | 5763 | 5789 |
| AMPL1429707 | TGAGCAAATCGGATCCCAGACTA       | GTAATCAGGTCCATAGAATTCACGTG      | 5937 | 5960 | 6133 | 6159 |
| AMPL1429709 | GCATTGCTCAAAGGCAATCAGATTTT    | GCATTGACCATGAAATGCCAATCTTTATAA  | 6272 | 6298 | 6486 | 6516 |
| AMPL1429711 | GCAACTACACAAACCAGTAATTGACTC   | GTTACTTCAGCGCCAAATGAATCTG       | 6637 | 6664 | 6884 | 6909 |
| AMPL1429713 | GGATGAAAAATTCAGCACATTCAAGC    | TTGGTATGTCCAATATTCCAAATTAGTGTCT | 7050 | 7077 | 7292 | 7324 |

A custom Ion AmpliSeq Panel was generated for use with the Ion Torrent S5 System. Primer sets were designed using the composite HPeV3 reference sequence (**Table S3**).

**Table S5. Primers used for PCR-amplification and Sanger sequencing.**

| Primer sequence                                         | Reference     |
|---------------------------------------------------------|---------------|
| Forward                                                 |               |
| SA-1-26F2: TTTGAAVKKGGTCTCCWAGAGAGCTT                   | This study    |
| SA-2568-2602F: GCTTGGTATGTGACTTCTCATGATTTTAACAATGG      | This study    |
| SA-2640-2668F: GGTCACGGCATGTTATCACAGTTTTTTGC            | This study    |
| SA-3063-3097F: GCTTATTTAGATAGGGGTTTTTACAAGCACTATGG      | This study    |
| SA-3519-3543F: CCACATTTTTCTCCTCAGCAGCCAC                | This study    |
| SA-3541-3580F: CACAGAAATTCTAGATAACGATTTGGTCAAATTCATAGTG | This study    |
| SA-3578-3611F: GTGAAAATACTCGTCAGAATTCTCTGTTACATGG       | This study    |
| SA3652-3679F: ATCTTCATCAGTGTGTCACCCTCCTGC               | This study    |
| SA-3682-3708F: GGCACCTCATGCAGTGTCTAATGGATGG             | This study    |
| SA-3710-3738F: GACGTTAAGAAATTGGCAGAAGTCGTAGC            | This study    |
| SA-4961-4995F: GCTTTCATAGAACCAAGACCAAGTGTCTTTAAATG      | This study    |
| SA-4995-5023F: GTTTCGCAACTAAAGTTGCAAACCAGACA            | This study    |
| SA-5033-5061F: GCTAAGGAAGTTGTGGATTGGTTCAGTAG            | This study    |
| SA-5314-5342F: TCTYACACAYTGTGCWGGWTAYCARCAYG            | This study    |
| SA-5324-5352F: TGTGCWGGWTAYCARCAYGAKGARATYAT            | This study    |
| SA-5342-5370F: CRTGYTGR TAWCCWGCACARTGTGTRAGA           | This study    |
| SA-5362-5398F: GCACTCAATTAAGTACCTTGAACAGGMAGAAGATTTG    | This study    |
| Calvert-6422-6446F1 GTNTAYARGATGATHATGATGGARA           | <sup>24</sup> |
| Calvert-6512-6534F2 GAYTGGCACTTYATGATYAAYGC             | <sup>24</sup> |
| Reverse                                                 |               |
| SA-258-224R: CACCCTGTGTAACACAGGTTAGAAAAGAATATG          | This study    |
| SA-294-266R: GGTATCTCACTATTAGGGTTATGGCAC                | This study    |
| SA-327-304R: GGATGGCTGTGTGAGCATAAAGGTC                  | This study    |
| SA-3805-3768R: ACTGTGTCACAAATTTGTTCTTTGATTTCTTCATCATC   | This study    |
| SA-4180-4143R: ACWGTATTGSTAATAWTTTTGTGGCAAATTCATAAAC    | This study    |
| SA-4290-4263R: CCTTGTCCYGGTTTTTCCCGTWCCAAA              | This study    |
| SA-4346-4329R: CACTGGCCGTAGGGGTGG                       | This study    |
| SA-5342-5314R: GAKGARATYATYYTRCAYGGVCACTCAAT            | This study    |
| SA-5352-5324R: ATRATYTCMTCRTGYTGR TAWCCWGCACA           | This study    |
| SA-5362-5335R: CCCATGTAGGATAATCTCATCGTGCTGG             | This study    |

|                                                  |            |
|--------------------------------------------------|------------|
| SA-5370-5342R: ATTGAGTGBCCRTGYARRATRATYTCMTC     | This study |
| SA-5658-5633R: CCACCCGAATGGTGGACCCTTTGGAC        | This study |
| SA-5738-5706R: GGCCACCACACATTCCTTTACATGATTTAACAG | This study |
| SA-5801-5771R: CTCCATTTCCAGCTATATGCATTCCAAGAAT   | This study |
| SA-6472-6443R: TGCCAGTCCAGAATAGTAGCATGGAGTTTG    | This study |
| SA-6509-6478R: CCATGAAGTGCCAATCCTTGTATGGGTAAATA  | This study |
| SA 6565-6539R: GGACCCATCATACTGGGAGTAATCCAT       | This study |
| Calvert-7275-7253R1 YTTARTCAACACCATGGGCAYYA      | 24         |
| Calvert-7243-7221R2 ATNACMACWTCATAATCATCCAC      | 24         |
